# Supplementary material for: Plasma and tissue angiotensin‐converting enzyme 2 activity and plasma equilibrium concentrations of angiotensin peptides in dogs with heart disease
Source: PubMed Central journal article supplement — J Vet Intern Med. 2019 Jun 28;33(4):1571–84. doi: 10.1111/jvim.15548 (PMC6639469; doi:10.1111/jvim.15548), 2019-06-28
Supplement: JVIM-33-1571-s002.pdf [file JVIM-33-1571-s002.pdf]

## **Supplemental Materials**

### **Immunohistochemistry**

For immunohistochemistry, 4 µm thick paraffin sections of kidney and myocardium were mounted on charged slides (ProbeOn, Thermo Fisher Scientific, Waltham, MA). The immunostaining procedure was performed using a commercial system (Leica BOND RXm automated platform combined with the Bond Polymer Refine Detection kit, Leica Biosystems, Buffalo Grove, IL). Briefly, after dewaxing and rehydration, sections were pretreated with epitope retrieval BOND ER1 citrate based buffer (pH=6.0, 20 min, 95 °C). Endogenous peroxidase was inactivated with 3% H<sub>2</sub>O<sub>2</sub> (10 min, room temperature (RT)). Nonspecific protein-protein interactions were blocked with blocking solution (Leica PowerVision IHC/ISH Super Blocking solution [PV6122], Leica Biosystems, Buffalo Grove, IL) for 30 minutes at RT. The primary antibody was prepared using the same solution as for the blocking step. Following application of the detection system, immunoreactivity was revealed with the diaminobenzidine chromogen reaction. Following counterstaining with hematoxylin, slides were dehydrated in an ethanol series, cleared in xylene, and permanently mounted with a resinous mounting medium (ClearVue coverslipper Thermo Fisher Scientific, Waltham, MA). Negative controls were performed by incubating sections of tissue with an irrelevant anti-CD20 rabbit polyclonal antibody (Rb9013, Thermo Fisher Scientific, Fremont, CA) with isotype-matched IgG (see Supplemental Figure 1), following the aforementioned protocol.

### **Details regarding the ACE2 activity assay**

The assay utilizes a synthetic peptide conjugate as a reaction substrate that is cleaved by ACE2 to release a free fluorophore. The fluorescence (Ex/Em=320 nm/420 nm) of each sample is quantified every 8 min for up to 120 min by a 96-well microplate fluorescence reader. Change in relative fluorescence units over time is converted to the amount of 4-methylcoumaryl-7-amide (MCA) released per minute using a standard curve generated by measuring the endpoint fluorescence (Ex/Em =320/420 nm) of known concentrations of a MCA standard solution ranging from 0 to 250 pmol/well of MCA. One mU of ACE2 activity is defined as the release of 1 pmol of MCA from the substrate per min.

### **Validation of the ACE2 activity assay**

Validation of the ACE2 assay included running internal controls with a kit-supplied ACE2 positive control and a synthetic peptide that inhibits ACE2 activity, which serves as a negative control. The ACE2 inhibitor is mixed in separate reaction wells with the positive control and the test samples to confirm that substrate degradation over the 120 min is due to ACE2 activity. Stability of the MCA standard, linearity of the standard curve, and evaluation of test performance of canine tissue and plasma with the kit substrate and kit-supplied ACE2 inhibitor were performed using study samples.

### *Performance of the MCA standard*

The imprecision of the measurement of MCA was determined at the five standard solution concentrations used in the assay. The concentrated MCA standard solution was diluted in assay linearity buffer. To assess within run performance, 100  $\mu$ L of each MCA concentration was added to duplicate ELISA plate wells and fluorescence (Ex/Em = 320/420 nm) measured every 8

minutes for 120 minutes. The experiment was repeated five times on five different days to determine the between run test performance. The coefficient of variation of the relative fluorescence units (RFUs) of each concentration was then calculated (Supplemental Table 1).

### *Linearity*

Linearity of the MCA standard over the range of concentrations was assessed by linear regression, using reagents prepared as described above (Supplemental Figure 2). Linearity of the ACE2 assay with varying concentrations of canine ACE2 activity was tested using two canine kidney tissue supernatant fluids. The total protein in each sample was determined by the BCA method. The RFU vs. time curves decreased in both samples when the amount of protein used was reduced. In each of the samples the higher protein concentrations exhausted the ACE2 MCA-synthetic peptide substrate before the end of the 120-minute time period, which was evident as a change in the slope of the curve by the end of the incubation period (Supplemental Figure 3).

### *ACE2 inhibitor*

To assess the performance of the ACE2 inhibitor with canine tissue supernatants and plasma, the ACE2 activity results from five plasma, kidney and myocardial samples run with and without the inhibitor in the reaction well were evaluated. The mean percent inhibition with each type of sample was calculated. The results showed mean percent inhibition +/- standard error of the measurement of  $91.6\% \pm 4.45\%$ ,  $94.1\% \pm 0.546\%$  and  $47.1\% \pm 7.00\%$  with canine plasma, and kidney and myocardial supernatant fluids, respectively (Supplemental Figure 4).

## Methodology and validation of the RAAS equilibrium concentration assay

Briefly, plasma conditioning for equilibrium analysis was performed at 37 °C followed by stabilization through the addition of an enzyme inhibitor cocktail (Attoquant Diagnostics, Vienna, Austria). Equilibrated plasma samples were further spiked with stable isotope-labeled internal standards for each AP at a concentration of 200 pg/ml. The samples then underwent C-18-based solid-phase-extraction and were subjected to LC-MS/MS analysis using a reversed-phase analytical column operating in line with a Xevo TQ-S triple quadrupole mass spectrometer (Waters Corporation, Milford, MA). Internal standards were used to correct for peptide recovery of the sample preparation procedure for each AP in each individual sample. Analyte concentrations were reported in pg/ml and were calculated considering the corresponding response factors determined in appropriate calibration curves in original sample matrix, on condition that integrated signals exceeded a signal-to-noise ratio of 10. The lower limit of quantification and validation data are shown in Supplemental Tables 2 and 3.

Supplemental Table 1. Precision of 4-methylcoumaryl-7-amide (MCA) measurements for assay of angiotensin converting enzyme 2 (ACE2) activity. RFU, relative fluorescent units.

|                              | MCA per 100 uL |          |          |          |          |
|------------------------------|----------------|----------|----------|----------|----------|
|                              | 50 pmol        | 100 pmol | 150 pmol | 200 pmol | 250 pmol |
| <i>Within run</i>            |                |          |          |          |          |
| Number of values             | 16             | 16       | 16       | 16       | 16       |
| RFU mean                     | 567.3          | 1132     | 1779     | 2332     | 2864     |
| RFU standard deviation       | 71.6           | 99.2     | 92.9     | 62.8     | 72.6     |
| Coefficient of variation (%) | 12.62          | 8.76     | 5.39     | 2.69     | 2.53     |

*Between run*

|                              |       |       |       |       |       |
|------------------------------|-------|-------|-------|-------|-------|
| Number of values             | 5     | 5     | 5     | 5     | 5     |
| RFU mean                     | 703   | 1335  | 1984  | 2642  | 3272  |
| RFU standard deviation       | 121.7 | 197.0 | 227.2 | 319.8 | 444.7 |
| Coefficient of variation (%) | 17.31 | 14.76 | 11.45 | 12.10 | 13.59 |

Supplemental Table 2. Lower limits of quantification associated with plasma equilibrium concentrations of individual angiotensin peptides measured using liquid chromatography-mass spectrometry/mass-spectroscopy.

| <u>Angiotensin peptide</u> | <u>Lower limit of quantification (pg/mL)</u> |
|----------------------------|----------------------------------------------|
| Angiotensin I (AT1[1-10])  | 3.0                                          |
| Angiotensin II (AT2[1-8])  | 1.0                                          |
| Angiotensin 1-9 (Ang1-9)   | 3.5                                          |
| Angiotensin 1-7 (Ang1-7)   | 2.0                                          |
| Angiotensin 1-5 (Ang1-5)   | 1.0                                          |
| Angiotensin 2-10 (Ang1-10) | 2.0                                          |
| Angiotensin III (AT3[2-8]) | 2.5                                          |
| Angiotensin IV (AT4[3-8])  | 1.5                                          |
| Angiotensin 2-7 (Ang2-7)   | 2.0                                          |
| Angiotensin 3-7 (Ang3-7)   | 1.0                                          |

1 Supplemental Table 3. Assay validation data of measurement of renin angiotensin aldosterone  
 2 system peptides in dog plasma and surrogate matrix using liquid chromatography-mass  
 3 spectrometry/mass-spectroscopy. The coefficients of variability (standard deviation divided by  
 4 the mean x 100%) are generally all below 15% and the slopes of the regression lines between the  
 5 assays as performed in dog plasma vs. calibration matrix for each peptide are similar. The  
 6 Pearson coefficients of determination ( $R^2$ ) demonstrate good assay linearity over a wide range of  
 7 values.

8

9

|    |                      | Coefficient of variability (%) at various |      |      |     |      |      | Slope | $R^2$ |
|----|----------------------|-------------------------------------------|------|------|-----|------|------|-------|-------|
|    |                      | peptide concentrations (pg/mL)            |      |      |     |      |      |       |       |
|    |                      | 5                                         | 20   | 80   | 320 | 1280 | 5120 |       |       |
| 10 |                      |                                           |      |      |     |      |      |       |       |
| 11 | AT1(1-10) Dog plasma | 12.1                                      | 7.8  | 11.7 | 2.9 | 2.8  | 1.6  | .80   | .99   |
| 12 | Calibration matrix   | 6.6                                       | 11.9 | 4.7  | 3.0 | .5   | 2.5  | .84   | .99   |
| 13 | AT2(1-8) Dog plasma  | 12.4                                      | 13.9 | 5.5  | 3.3 | 3.1  | 2.3  | .72   | 1.00  |
| 14 | Calibration matrix   | 7.1                                       | 6.3  | 1.0  | 3.9 | 2.5  | 1.3  | .73   | .99   |
| 15 | Ang1-9 Dog plasma    | 7.0                                       | 15.6 | 6.9  | 2.6 | 1.0  | 3.3  | 1.38  | .99   |
| 16 | Calibration matrix   | 18.5                                      | 12.0 | 5.7  | 5.5 | 2.2  | 1.3  | 1.34  | .99   |
| 17 | Ang1-7 Dog plasma    | 3.2                                       | 9.9  | 13.1 | 3.7 | 3.3  | 3.7  | 1.22  | 1.00  |
| 18 | Calibration matrix   | 8.4                                       | 4.5  | 4.7  | 2.5 | 1.5  | .90  | 1.21  | .99   |
| 19 | Ang1-5 Dog plasma    | 11.8                                      | 6.7  | 6.3  | 1.7 | 2.9  | 2.2  | 1.10  | 1.00  |
| 20 | Calibration matrix   | 11.9                                      | 5.5  | 3.7  | 2.5 | 2.0  | 2.1  | 1.06  | .99   |
| 21 | Ang2-10 Dog plasma   | 5.0                                       | 9.8  | 2.0  | 2.1 | 2.5  | 2.5  | .45   | 1.00  |
| 22 | Calibration matrix   | 9.1                                       | 2.7  | 4.2  | 3.1 | 1.6  | 1.4  | .45   | 1.00  |
| 23 | AT3(2-8) Dog plasma  | 5.3                                       | 9.0  | 1.8  | 4.4 | 3.3  | .90  | 1.51  | 1.00  |
| 24 | Calibration matrix   | 9.0                                       | 11.5 | 6.5  | 2.1 | 2.2  | 2.6  | 1.50  | 1.00  |
| 25 | AT4(3-8) Dog plasma  | 5.3                                       | 5.7  | .40  | 2.4 | .90  | 1.5  | .59   | 1.00  |
| 26 | Calibration matrix   | 3.1                                       | 2.4  | 2.6  | 3.2 | 2.5  | 1.2  | .59   | .99   |
| 27 | Ang2-7 Dog plasma    | 11.1                                      | 5.4  | 2.7  | 5.6 | 1.0  | 4.4  | 4.18  | 1.00  |
| 28 | Calibration matrix   | 12.1                                      | 7.3  | 5.8  | 5.8 | 1.1  | 4.2  | 3.94  | .99   |
| 29 | Ang3-7 Dog plasma    | 18.5                                      | 10.5 | 15.8 | 4.3 | 2.1  | 6.5  | 1.15  | 1.00  |
| 30 | Calibration matrix   | 15.9                                      | 10.4 | 3.2  | 5.6 | 2.0  | 1.5  | 1.17  | 1.00  |

31

32 Supplemental Table 4. Correlation coefficient (Spearman rho, first line) and corresponding P  
 33 value (second line) between plasma equilibrium concentrations of angiotensin peptides and  
 34 echocardiographic indices of left heart size in 26 dogs with degenerative mitral valve disease or  
 35 dilated cardiomyopathy. LVIDdN, normalized left ventricular internal dimension at end-diastole;  
 36 LVIDsN, normalized left ventricular internal dimension at end-systole; LA:Ao, left atrium  
 37 diameter to aortic root diameter ratio.

38

| 39 | Angiotensin peptide        | LVIDdN       | LVIDsN       | LA:Ao        |
|----|----------------------------|--------------|--------------|--------------|
| 40 | Angiotensin I (AT1[1-10])  | .510         | .293         | .508         |
| 41 |                            | <u>.0078</u> | .086         | <u>.0081</u> |
| 42 |                            |              |              |              |
| 43 | Angiotensin II (AT2[1-8])  | -.107        | .0204        | -.076        |
| 44 |                            | .60          | .93          | .71          |
| 45 |                            |              |              |              |
| 46 | Angiotensin 1-9 (Ang1-9)   | .624         | .147         | .548         |
| 47 |                            | <u>.0007</u> | .47          | <u>.0037</u> |
| 48 |                            |              |              |              |
| 49 | Angiotensin 1-7 (Ang1-7)   | .507         | .470         | .374         |
| 50 |                            | <u>.0082</u> | <u>.016</u>  | .060         |
| 51 |                            |              |              |              |
| 52 | Angiotensin 1-5 (Ang1-5)   | -.072        | .235         | -.013        |
| 53 |                            | .72          | .25          | .95          |
| 54 |                            |              |              |              |
| 55 | Angiotensin 2-10 (Ang1-10) | .469         | .295         | .456         |
| 56 |                            | <u>.016</u>  | .14          | <u>.019</u>  |
| 57 |                            |              |              |              |
| 58 | Angiotensin III (AT3[2-8]) | -.078        | .143         | .039         |
| 59 |                            | .71          | .49          | .85          |
| 60 |                            |              |              |              |
| 61 | Angiotensin IV (AT4[3-8])  | -.080        | .072         | .068         |
| 62 |                            | .70          | .72          | .74          |
| 63 |                            |              |              |              |
| 64 | Angiotensin 2-7 (Ang2-7)   | .407         | .526         | .326         |
| 65 |                            | <u>.039</u>  | <u>.0058</u> | .10          |
| 66 |                            |              |              |              |
| 67 | Angiotensin 3-7 (Ang3-7)   | .506         | .424         | .331         |
| 68 |                            | <u>.0084</u> | <u>.031</u>  | .098         |
| 69 |                            |              |              |              |

70 **Supplemental Figure Legends**

71  
72 Supplemental Figure 1. Representative photomicrographs of anti-angiotensin converting enzyme  
73 2 (ACE2) immunolabeling negative controls from a 10 year old male neutered French bulldog  
74 that was euthanized secondary to upper airway obstruction (Kidney, A, B; left ventricular  
75 myocardium, C), a 10 year old female spayed mixed breed dog euthanized for severe heart  
76 failure due to degenerative mitral valve disease (DMVD) (Kidney, D, E), and a 10 year old  
77 female spayed Chihuahua also euthanized for severe heart failure due to DMVD (LV  
78 myocardium, F). There is an absence of immunolabeling in all sections. 20x, A, D; 40X, B, C,  
79 E, F.

80  
81 Supplemental Figure 2. Linearity of the 4-methylcoumaryl-7-amide (MCA) standard curve used  
82 for measurement of angiotensin converting enzyme 2 activity.

83  
84 Supplemental Figure 3. Fluorescent activity curves using different volumes of canine kidney  
85 supernatant fluid.

86  
87 Supplemental Figure 4. Performance of the kit-supplied angiotensin converting enzyme 2  
88 (ACE2) inhibitor on total ACE2 activity with varying canine tissue samples. Columns show the  
89 mean percent inhibition +/- the standard error of the measurement.

90  
91 Supplemental Figure 5. Equilibrium concentrations of various individual angiotensin peptides  
92 (APs) at baseline and after incubation with recombinant human angiotensin converting enzyme 2  
93 (rhACE2). Treatment of plasma from dogs with stage B2 or stage C heart disease decreased  
94 maladaptive APs such as angiotensin I (AT1[1-10]) and angiotensin II (AT2[1-8]) and increased  
95 cardioprotective APs such as angiotensin 1-9 (Ang1-9), angiotensin 1-7 (Ang1-7), and

96 angiotensin 1-5 (Ang1-5). Data suggest that the balance between the beneficial and maladaptive  
97 APs can be made more favorable by rhACE2. See text for description of the modified clinical  
98 staging system.  
99
