# Supplementary figures and images for: Plasma and tissue angiotensin‐converting enzyme 2 activity and plasma equilibrium concentrations of angiotensin peptides in dogs with heart disease
Source: PubMed Central journal article supplement — J Vet Intern Med. 2019 Jun 28;33(4):1571–84. doi: 10.1111/jvim.15548 (PMC6639469; doi:10.1111/jvim.15548), 2019-06-28

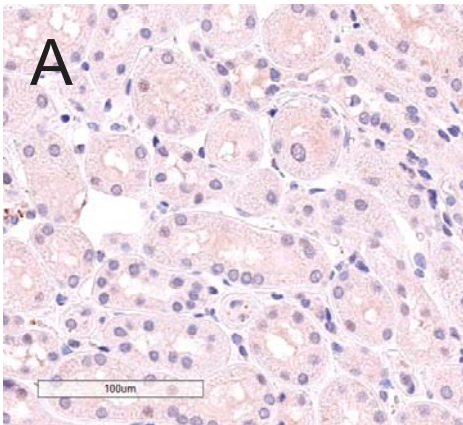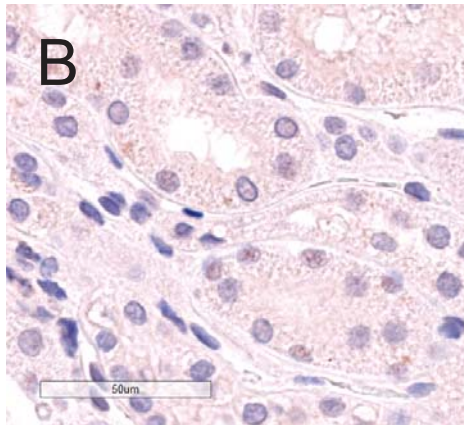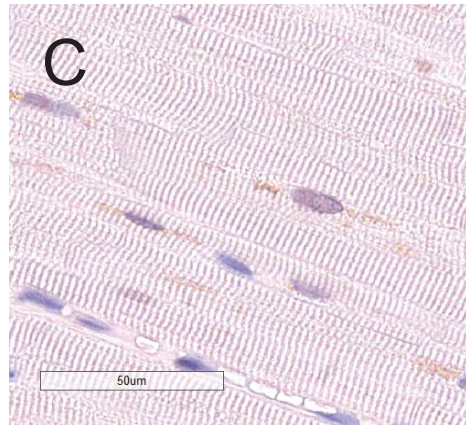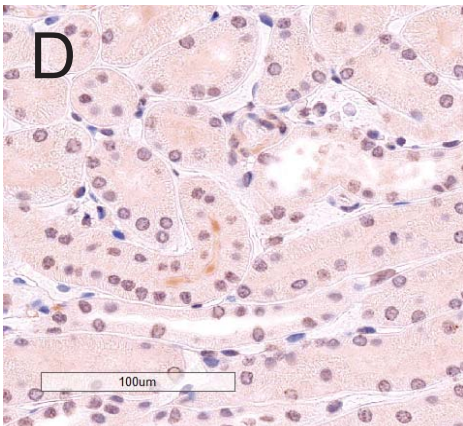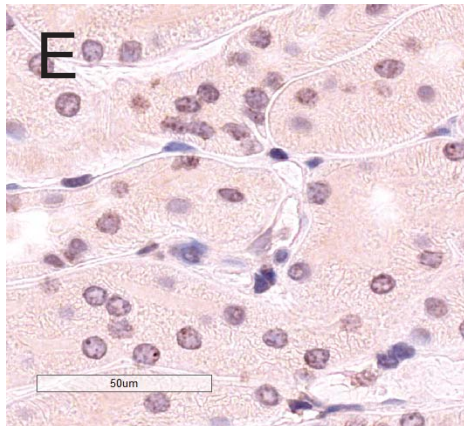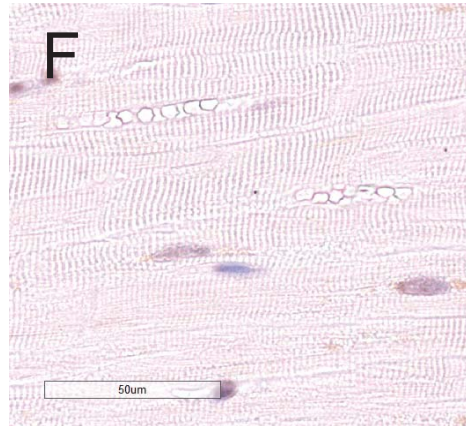

Supplement: JVIM-33-1571-s001.pdf [file JVIM-33-1571-s001.pdf]

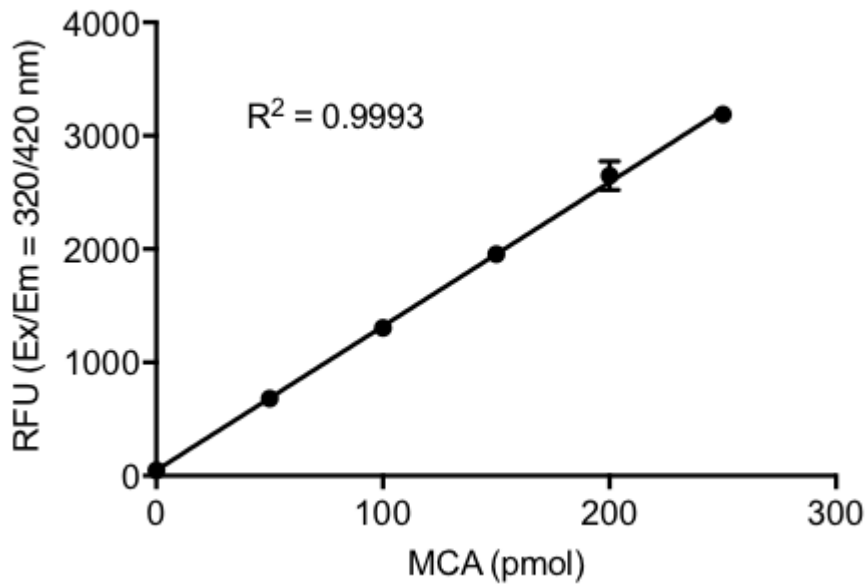

Supplement: JVIM-33-1571-s003.pdf [file JVIM-33-1571-s003.pdf]

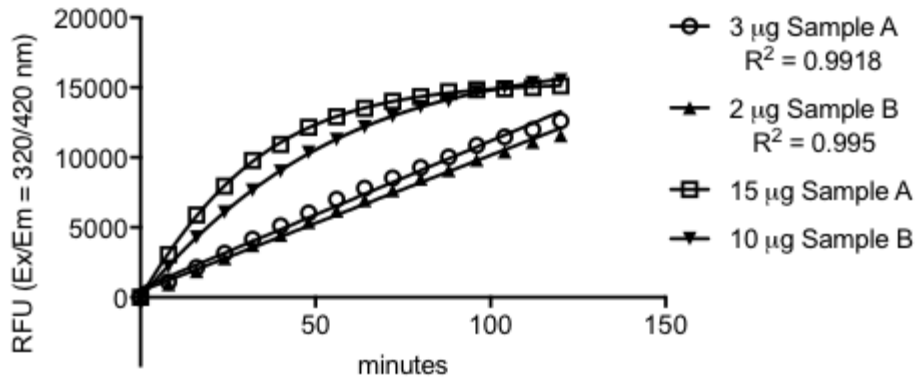

Supplement: JVIM-33-1571-s004.pdf [file JVIM-33-1571-s004.pdf]

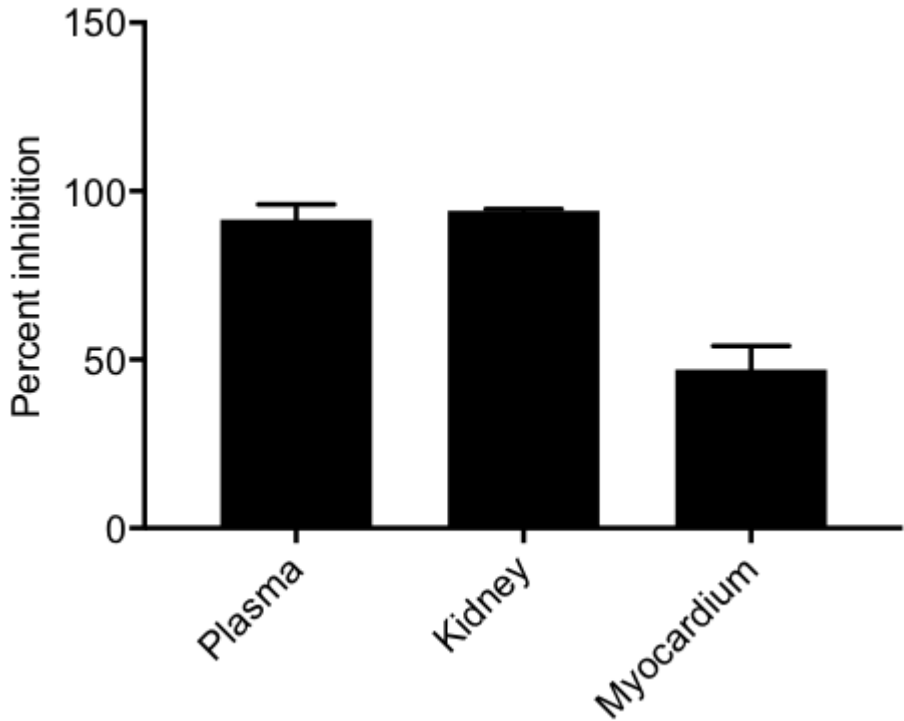

Supplement: JVIM-33-1571-s005.pdf [file JVIM-33-1571-s005.pdf]

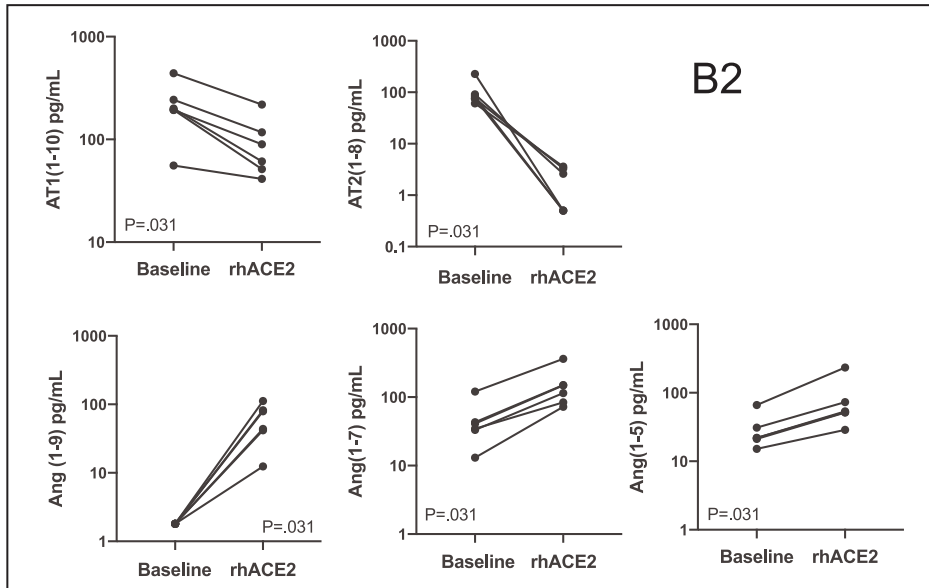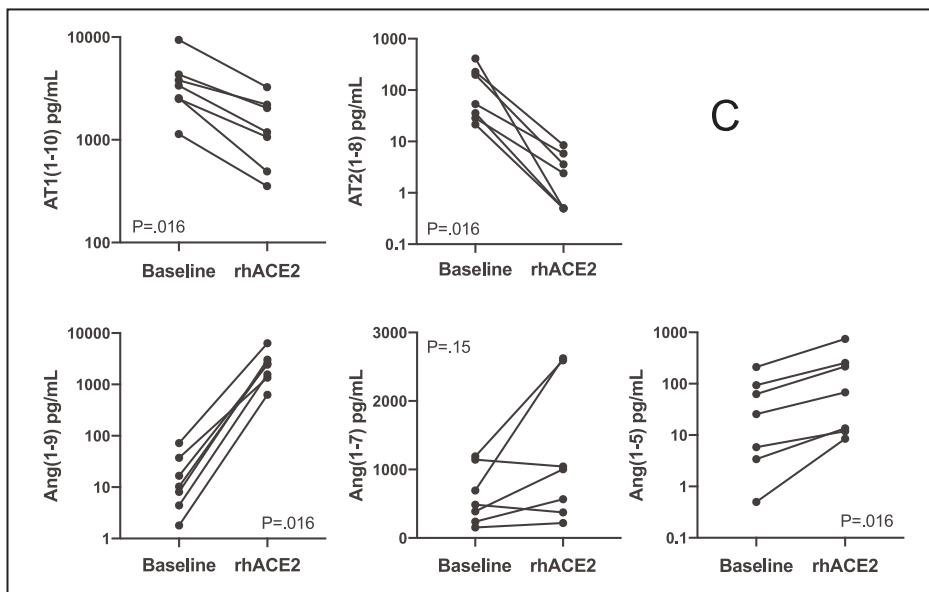

Supplement: JVIM-33-1571-s006.pdf [file JVIM-33-1571-s006.pdf]
